# Supplementary material for: A framework for implementing robotic process automation projects
Source: Springer Nature journal article supplement (doi:10.1007/s10257-022-00553-8), 2022-03-29
Supplement: MOESM2 [file 20266094]

---

# Interview

## Robotic Process Automation

Version 1.0

|                           |
|---------------------------|
| <b>Name:</b>              |
| <b>Datum:</b>             |
| <b>Unternehmen:</b>       |
| <b>Berufsbezeichnung:</b> |
| <b>Interviewer:</b>       |

## Teil A: Hintergrundinformationen, Erfahrungen und Kompetenzen

**A1: Wie viel Jahre arbeiten Sie bereits in der Branche/in dem Sektor?**

- < 2 Jahre     2-5 Jahre     5-15 Jahre     > 15 Jahre

**A2: Über wie viele Jahre praktische Erfahrung verfügen Sie im Bereich RPA?**

- < 1 Jahr     1-2 Jahre     3-5 Jahre     6-8 Jahre     > 8 Jahre

**A3: Welche Rolle/Position haben Sie im Unternehmen (und in Bezug auf RPA)?**

**A4: Wie viele Mitarbeiter beschäftigt Ihr Unternehmen derzeit schätzungsweise?**

## Teil B: Abgleich von Theorie und Praxis

**B1: Beschreiben Sie bitte die Implementierung und den Betrieb von RPA in Ihrem Unternehmen.**

**Leitpunkte:**

- 1) Welche Schritte wurden zur Implementierung von RPA durchgeführt?
- 2) Wie wurde der Automatisierungsbedarf identifiziert?
- 3) Wo ist RPA organisational verankert?
- 4) Welche Herausforderungen mussten bewältigt werden?
- 5) Wie viele Mitarbeiter arbeiten aktiv im Bereich RPA?
- 6) Wurden externe Berater eingebunden?
- 7) Seit wann erfolgt der Einsatz von RPA?

**B2.1: Welche Ziele verfolgen Sie konkret mit dem Einsatz von RPA?**

**Mögliche Ziele:**

- |                                  |                                                  |                                              |
|----------------------------------|--------------------------------------------------|----------------------------------------------|
| 1) Erhöhte Produktivität         | 7) Einhaltung von Compliance-Vorgaben            | 10) Kommunikation verschiedener IT-Systeme   |
| 2) Erhöhtes Prozessvolumen       | 8) Einfache und unkomplizierte Automatisierungen | 11) Positiver Einfluss auf das Betriebsklima |
| 3) Erhöhte Qualität              | 9) Automatisierung des Long Tail of Processes    | 12) Weitere Ziele                            |
| 4) Effizienzsteigerung           |                                                  |                                              |
| 5) Kosteneinsparung              |                                                  |                                              |
| 6) Kontinuierliche Verfügbarkeit |                                                  |                                              |

**B2.2: Welche Risiken sehen Sie konkret durch den Einsatz von RPA?**

**Mögliche Risiken:**

- |                                                    |                                                     |
|----------------------------------------------------|-----------------------------------------------------|
| 1) Verlust von Know-how                            | 4) Geringere Performance gegenüber Backend-Systemen |
| 2) Datenschutz und Sicherheit                      | 5) Mitarbeiterrückgang                              |
| 3) Keine tiefgreifende Integration von IT-Systemen | 6) Negativer Einfluss auf das Betriebsklima         |
|                                                    | 7) Weitere Risiken                                  |

**B3.1 Haben Sie vor der RPA-Einführung ein Screening verschiedener Technologien zur Prozessautomatisierung durchgeführt?**

ja       nein

**Mögliche Alternativen:**

- |                                        |                                      |
|----------------------------------------|--------------------------------------|
| 1) Business Process Management-Systeme | 3) Bereiche aus dem Machine Learning |
| 2) Rapid Process Reengineering         | 4) Weitere Technologien              |

### **B3.2 Weshalb wurde RPA ausgewählt?**

#### **Mögliche Gründe:**

- |                                  |                                               |
|----------------------------------|-----------------------------------------------|
| 1) Viele verschiedene IT-Systeme | 4) Geringe Kosten                             |
| 2) Keine APIs verfügbar          | 5) IT-Abteilung hat Automatisierung abgelehnt |
| 3) Einfache Implementierung      | 6) Weitere Gründe                             |

### **B4.1 Welche konkreten Prozesse automatisieren Sie mit RPA?**

### **B4.2 Welche Prozesseigenschaften spielten für die Prozessauswahl eine Rolle?**

#### **Mögliche Eigenschaften:**

- |                                  |                                        |
|----------------------------------|----------------------------------------|
| 1) Regelbasiert / standardisiert | 5) Hoher Reifegrad                     |
| 2) Häufigkeit / Prozessvolumen   | 6) Erfordern kein implizites Know-how  |
| 3) Deterministische Ergebnisse   | 7) Geringe Exception Rate              |
| 4) Stabilität                    | 8) Einbindung verschiedener IT-Systeme |
|                                  | 9) Weitere Eigenschaften               |

### **B4.3 Haben Sie zur Auswahl geeigneter Prozesse quantitative Methoden durchgeführt, wie etwa Process Mining?**

**B5.1 Welche RPA-Software verwenden Sie?**

**B5.2 Welche Faktoren spielten bei der Entscheidung eine Rolle?**

**Mögliche Faktoren:**

- |                                                |                                                    |
|------------------------------------------------|----------------------------------------------------|
| 1) Kontinuierliche Verfügbarkeit der Roboter   | 5) Ähnlichkeit zu bereits eingesetzten IT-Systemen |
| 2) Multi-user Funktionalität                   | 6) Bereits bestehende Beziehungen zum RPA-Anbieter |
| 3) Daten in real-time abrufbar                 | 7) Finanzielle Aspekte                             |
| 4) Automatisierung eines hohen Prozessvolumens | 8) Weitere Faktoren                                |

**B5.3 Wie gestaltete sich der Software-Auswahlprozess?**

**Mögliche Schritte:**

- |                        |                     |
|------------------------|---------------------|
| 1) Zielfestlegung      | 4) Vorauswahl       |
| 2) Anforderungsanalyse | 5) Detailauswahl    |
| 3) Marktübersicht      | 6) Weitere Schritte |

**B6.1 Wurde ein Proof of Concept zur RPA-Einführung durchgeführt?**

ja  nein

**B6.2 Welche Aspekte wurden beim PoC berücksichtigt?**

**Mögliche Aspekte:**

- |                                                  |                                                          |
|--------------------------------------------------|----------------------------------------------------------|
| 1) Technische Machbarkeit                        | 6) Beantwortung unternehmensspezifischer Fragestellungen |
| 2) Finanzielle Machbarkeit                       | 7) Einbindung von IT, Governance, externen Beratern etc. |
| 3) Automatisierung von simplen Pilotprozessen    | 8) Weitere Aspekte                                       |
| 4) Abgleich mit manuell durchgeführten Prozessen |                                                          |
| 5) RPA-Training                                  |                                                          |

**B7.1 Wurde ein Business Case zur RPA-Einführung erstellt?**

ja  nein

**B7.2 Welche Faktoren spielten dabei eine wichtige Rolle?**

**Mögliche Faktoren:**

- |                                                |                                                                       |
|------------------------------------------------|-----------------------------------------------------------------------|
| 1) Erkenntnisse aus dem PoC                    | 4) Automatisierung einer bestimmten Prozessanzahl                     |
| 2) Lücke zwischen PoC und Skalierung schließen | 5) Erfassung von Durchlaufzeiten, Infrastrukturkosten, IT-Kosten etc. |
| 3) Reduktion ein bestimmten FTE-Anzahl         | 6) Weitere Faktoren                                                   |

**B8.1 Wurde die Anzahl automatisierter Prozesse sukzessive erhöht?**

ja  nein

## B8.2 Welche Faktoren spielten bei der Skalierung eine wichtige Rolle?

### Mögliche Faktoren:

- |                                          |                                 |
|------------------------------------------|---------------------------------|
| 1) Stetige Erhöhung der Komplexität      | 6) Einbindung Change Management |
| 2) Erhöhung der Softwarelizenzen         | 7) Einbindung IT-Abteilung      |
| 3) Aufstockung des RPA-Teams             | 8) Einbindung externe Berater   |
| 4) Aufbau einer zentralen RPA-Bibliothek | 9) Nutzerakzeptanztests         |
| 5) Fortgeschrittenes RPA-Training        | 10) Weitere Faktoren            |

## B9.1 Betreibt Ihr Unternehmen ein Center of Excellence?

- ja       nein

## B9.2 Wie ist das Center of Excellence organisiert?

### Mögliche Aspekte:

- |                                 |                             |
|---------------------------------|-----------------------------|
| 1) Zentral / dezentral / hybrid | 2) Intern / extern / hybrid |
|                                 | 3) Weitere Aspekte          |

## B9.3 Welche Funktionen übernimmt das CoE?

### Mögliche Funktionen:

- |                                       |                                                   |
|---------------------------------------|---------------------------------------------------|
| 1) Überwachung der Roboter            | 5) Festlegung von Rollen und Verantwortlichkeiten |
| 2) Wartung der Roboter                | 6) Steuerung des RPA-Angebots                     |
| 3) Identifikation geeigneter Prozesse | 7) Austausch mit IT-Abteilung                     |
| 4) Restrukturierung des RPA-Teams     | 8) Weitere Funktionen                             |

## Teil C: Evaluation des vorläufigen Frameworks

Ausgehend von den zur Verfügung stehenden Studien und Case Studies wurde eine Vorgehensweise zur Implementierung von RPA entwickelt, die sich in acht Phasen gliedert. Eine Übersicht der einzelnen Phasen kann dem folgenden Flowchart entnommen werden. Die darauffolgende Tabelle enthält zudem eine Kurzerklärung der Phasen.

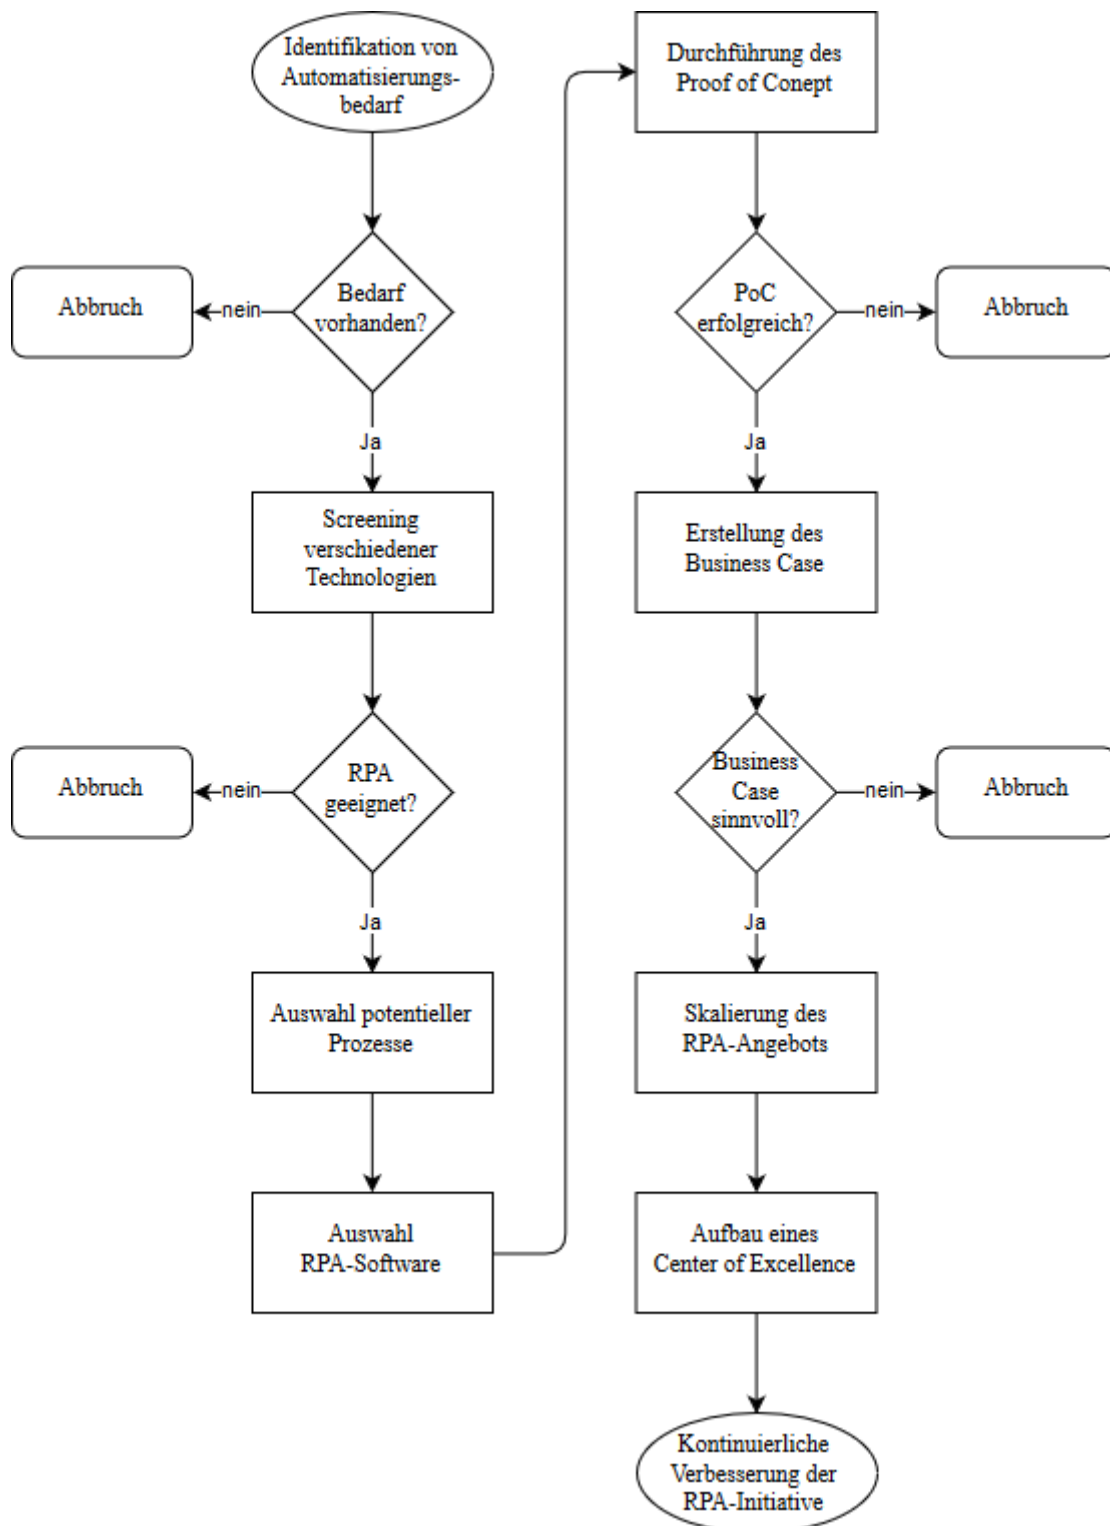



## Kurzerklärung der einzelnen Phasen

| # | Bezeichnung                               | Beschreibung                                                                                                                                                                                 |
|---|-------------------------------------------|----------------------------------------------------------------------------------------------------------------------------------------------------------------------------------------------|
| 1 | Identifikation von Automatisierungsbedarf | <ul style="list-style-type: none"><li>• Erfassung, ob das Unternehmen gegenwärtig einen Bedarf an Prozessautomatisierungen aufzuweisen hat</li></ul>                                         |
| 2 | Screening verschiedener Technologien      | <ul style="list-style-type: none"><li>• Screening aller potentiellen Automatisierungsmethoden</li><li>• Feststellen, ob RPA geeignet ist</li></ul>                                           |
| 3 | Auswahl potentieller Prozesse             | <ul style="list-style-type: none"><li>• Identifikation von Prozessen, die für RPA geeignet sind</li><li>• Festlegung relevanter Prozesseigenschaften</li></ul>                               |
| 4 | Auswahl RPA-Software                      | <ul style="list-style-type: none"><li>• Produktevaluation verschiedener RPA-Plattformen</li><li>• Ableitung von Anforderungen aus Punkt 3</li></ul>                                          |
| 5 | Durchführung des Proof of Concept         | <ul style="list-style-type: none"><li>• Überprüfung der technischen und finanziellen Machbarkeit</li><li>• Automatisierung ausgewählter Prozesse</li></ul>                                   |
| 6 | Erstellung des Business Case              | <ul style="list-style-type: none"><li>• Ableitung des Business Case aus Punkt 5</li><li>• Schließung der Lücke zwischen kleinem PoC und breiter Skalierung von RPA</li></ul>                 |
| 7 | Skalierung des RPA-Angebots               | <ul style="list-style-type: none"><li>• Sukzessive Erhöhung der Anzahl automatisierter Prozesse, Aufbau einer RPA-Bibliothek</li><li>• Erweiterung RPA-Team, Softwarelizenzen etc.</li></ul> |
| 8 | Aufbau eines Center of Excellence         | <ul style="list-style-type: none"><li>• Festlegung struktureller Grundsatzfragen (zentral/dezentral, intern/extern etc.)</li><li>• Definition von Rollen, Skills, KPIs etc.</li></ul>        |

**C1: Inwiefern halten Sie die dargestellte Vorgehensweise für sinnvoll?**

**C2: Inwiefern halten Sie die dargestellte Vorgehensweise für umsetzbar?**

**C3: Würden Sie weitere Phasen ergänzen?**

**C4: Würden Sie einzelne Phasen streichen?**

**C5: Würden Sie einzelne Phasen zusammenfassen?**

**C6: Würden Sie die Reihenfolge der Phasen ändern?**

**C7: Welche Anforderungen müssten in Ihrem Unternehmen erfüllt sein, damit die Vorgehensweise erfolgreich umgesetzt werden könnte?**

**C8: Inwiefern unterscheidet sich die Vorgehensweise von der Ihres Unternehmens?**
